# Supplementary material for: Detection of miRNA regulatory effect on triple negative breast cancer transcriptome
Source: PubMed Central journal article supplement (PMC4460783; doi:10.1186/1471-2164-16-s6-s4), 2015-06-01

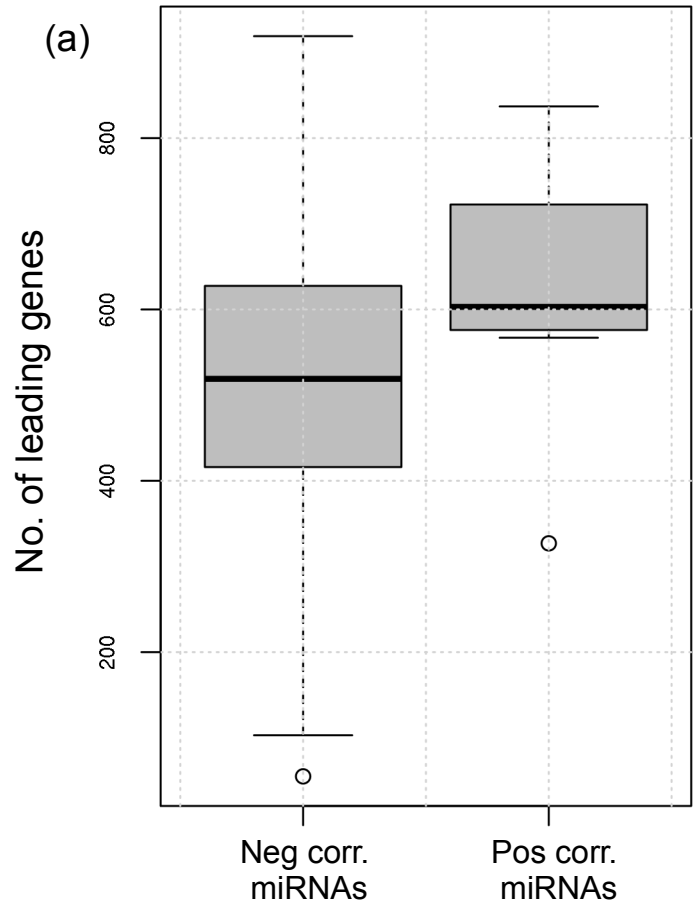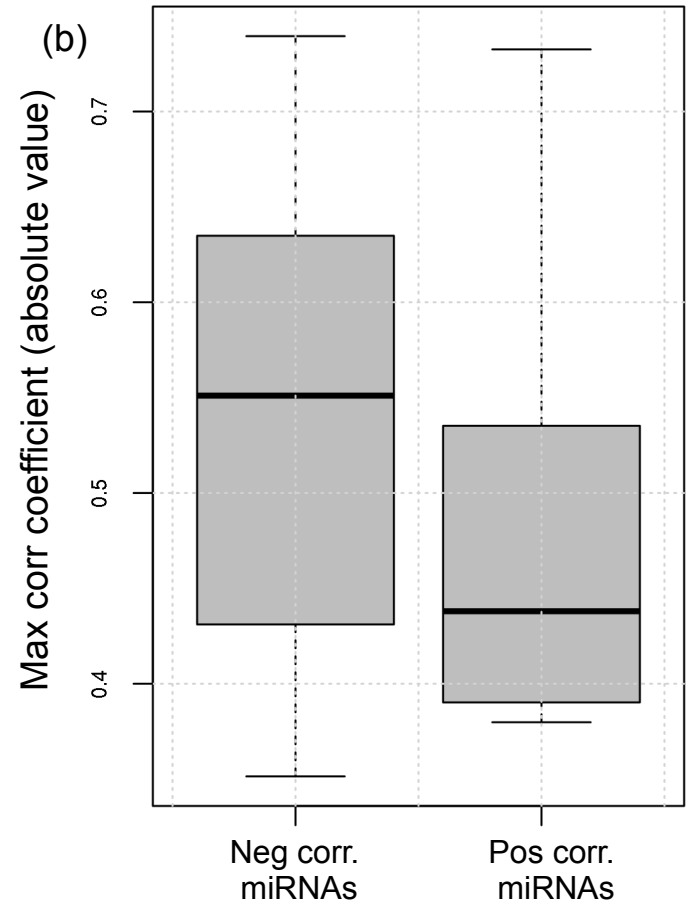

Supplement: 1471-2164-16-S6-S4-S2.pdf [file 1471-2164-16-S6-S4-S2.pdf]
